# Supplementary material
Source: PubMed Central journal article supplement (PMC6732218)
Supplement: NIHMS535334-supplement-legend.pdf [file NIHMS535334-supplement-legend.pdf]

## LEGENDS TO SUPPLEMENTAL FIGURES:

**Supplemental 1. mGluR1 and mGluR5 are Expressed at Low Levels on Activated Microglia, Astrocytes, and Axons Early in Rodent Development.** At postnatal day 6 (P6), mGluR1 (A, green, arrows) and mGluR5 (B, green, arrows) are expressed at low levels on the spheroid cell bodies of CD68-positive activated microglia (red) in the callosal white matter of normal, developing rats. Similarly, low levels of mGluR1 (C, E, green) and mGluR5 (D, F, green) expression are observed on GFAP-positive astrocyte cell bodies and processes (C, D, red) in the white matter and on Neurofilament 160 KDa-positive axons (E, F, red) in overlying cortex.

**Supplemental 2: mGluR5 is Expressed on Astrocytes in Human White Matter Late in Gestation.** At 38 post-conceptual weeks (38 PCW), numerous GFAP-positive astrocytes (D, red) express mGluR5 (E, F, green). In contrast, fewer GFAP-positive astrocytes (A, red) express mGluR5 (B, C, green) at younger stages of development through the preterm period, including 36 PCW (A-C).
