# Supplementary material
Source: PubMed Central journal article supplement (PMC6732218)

1  
2  
3  
4  
5  
6  
7  
8  
9  
10  
11  
12  
13  
14  
15  
16  
17  
18  
19  
20  
21  
22  
23  
24  
25  
26  
27  
28  
29  
30  
31  
32  
33  
34  
35  
36  
37  
38  
39  
40  
41  
42  
43  
44  
45  
46  
47  
48  
49  
50  
51  
52  
53  
54  
55  
56  
57  
58  
59  
60

**Supplemental Figure 1:**

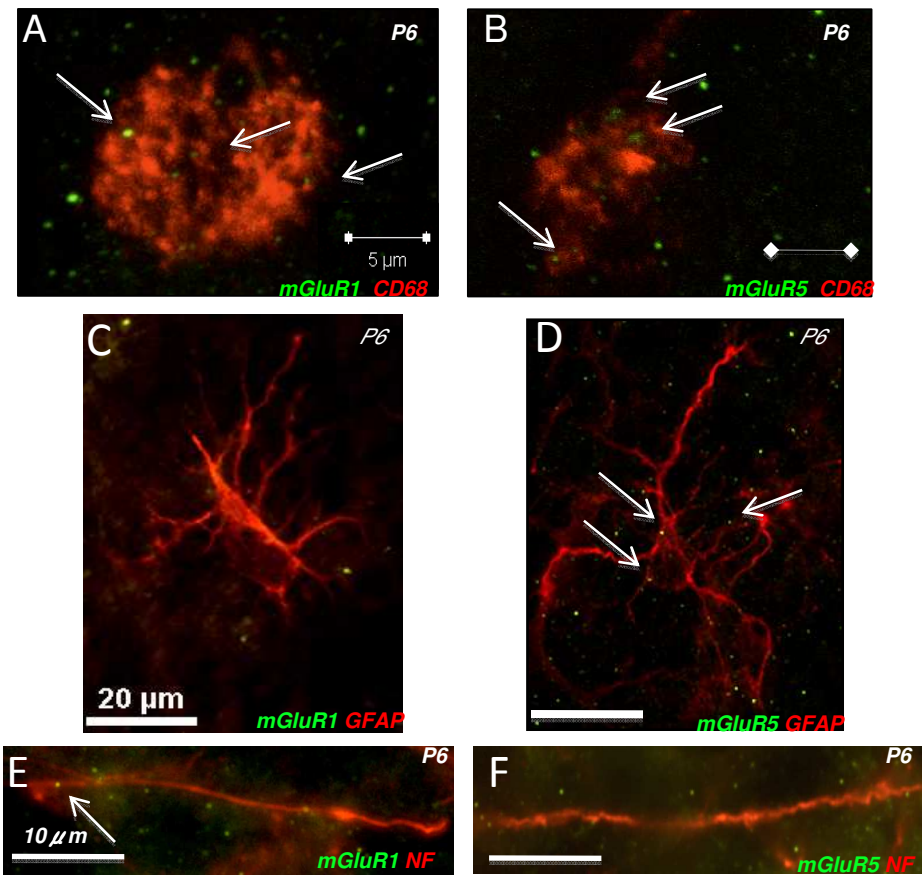

1  
2  
3  
4  
5  
6 **Supplemental Figure 2:**  
7  
8  
9

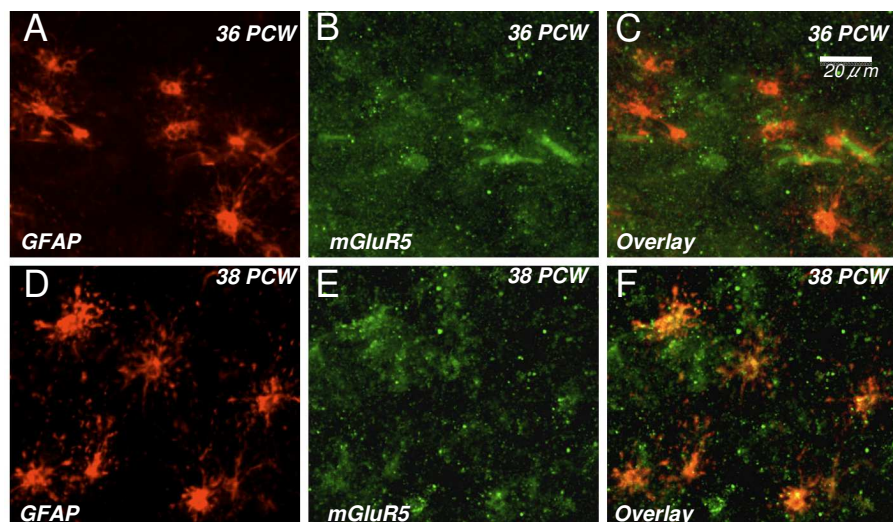

Supplement: NIHMS535334-supplement-figure_1.pdf [file NIHMS535334-supplement-figure_1.pdf]
